# Supplementary material
Source: publisher site journal article supplement (https://neobiota.pensoft.net/article/23509/download/suppl/34/)
Supplement: Supplementary file 1

**Table S4.** A summary of the impact assessment using the Socio-Economic Impact Classification for Alien Taxa. Impact scores, from highest to lowest are Massive (MV), Major (MR), Moderate (MO), Minor (MN) and Minimal Concern (MC).

| **Species** | **Constituent of human well-being** | **Activity** | **Impact score** | **Reference** | **Region** |
| --- | --- | --- | --- | --- | --- |
| *Bos taurus* | Material and immaterial goods for good life | Sufficient nutritious food- Animal farming | MN | Tollner, Calvert and Langdale (1990) | Mainland |
| *Canis familiaris* | Health | being healthy | MO | Bizri et al. (2000) | Mainland |
| being healthy | MO | Demma et al. (2005) | Mainland |
| feeling well-being healthy | MO | Prakash et al. (2003) | Mainland |
| being healthy | MO | Sacks, Sattin and Bonzo (1979) | Mainland |
| being healthy | MN | Cleaveland (1996) | Mainland |
| being healthy | MN | Eidson and Bingman (2010) | Mainland |
| being healthy | MN | Randall et al. (2006) |  |
| being healthy | MN | Salb et al. (2008) | Mainland |
| being healthy | MC | Abdel-Moein and Hamza (2016) | Mainland |
| being healthy | MC | Bingham (2005) | Mainland |
| being healthy | MC | Centers for Disease Control and Prevention (1997) | Mainland |
| Material and immaterial goods for good life | Adequate livelihoods; Sufficient nutritious food- Livestock farming | MR | Ciucci and Boitani (1998) | Mainland |
| Sufficient nutritious food- Livestock farming | MO | Boggess, Andrews and Bishop (1978) | Mainland |
| Adequate livelihoods; Sufficient nutritious food- Livestock farming | MO | Pimentel et al. (2000) | Mainland |
| *Canis familiaris* | Material and immaterial goods for good life | Sufficient nutritious food- Animal farming | MO | Pimentel, Zuniga and Morrison (2005) | Mainland |
| Sufficient nutritious food- Livestock farming | MO | Young et al. (2011) |  |
| Adequate livelihoods; Sufficient nutritious food- Agriculture | MN | Green and Gipson (1994) |  |
| Sufficient nutritious food- Livestock farming | MN | Randall et al. (2006) | Mainland |
| Adequate livelihoods; Sufficient nutritious food- Livestock farming | MN | Randall et al. (2004) | Mainland |
| Sufficient nutritious food- Livestock farming | MN | van Bommel (2013) | Mainland |
| Sufficient nutritious food- Livestock farming | MC | Abdel-Moein and Hamza (2016) | Mainland |
| Safety | Personal safety- feeling safe | MO | Sacks, Kresnow and Houston (1996) | Mainland |
| Personal safety- feeling safe | MN | Green and Gipson (1994) |  |
| Personal safety- feeling safe | MN | Pimentel et al. (2000) | Mainland |
| Social, spiritual and cultural relations | Social, spiritual and cultural practice- can't practise culture | MR | Prakash et al. (2003) | Mainland |
| *Capra hircus* | Material and immaterial goods for good life | Sufficient nutritious food- Animal farming | MN | Chynoweth et al. (2013) | Island |
| Sufficient nutritious food- Animal farming | MN | Parkes, Henzell and Pickles (1996) | Mainland |
| *Equus asinus* | Material and immaterial goods for good life | Sufficient nutritious food- Agricultural farming | MN | Hamrick et al. (2005) | Mainland |
| Sufficient nutritious food- Agricultural farming | MN | Pimentel, Zuniga and Morrison (2005) | Mainland |
| *Equus ferus caballus* | Material and immaterial goods for good life | Sufficient nutritious food- Agricultural farming | MO | Pimentel et al. (2000) | Mainland |
| Sufficient nutritious food- Animal farming | MN | Salter and Hudson (1980) | Mainland |
| Sufficient nutritious food- Animal farming | MC | Miller (1983) | Mainland |
| *Felis catus* | Health | being healthy | MO | Carter and Frank (1986) | Mainland |
| being healthy | MO | Cornell University College of Veterinary Medicine (2017) |  |
| being healthy | MO | Jones et al. (2001) | Mainland |
| being healthy | MN | Dabritz and Conrad (2010) | Mainland |
| being healthy | MN | Scientific American | Mainland |
| being healthy | MN | Eidson and Bingman (2010) | Mainland |
| being healthy | MN | O’Neil, Mack and Gilchrist (2007) | Mainland |
| being healthy | MN | Stagno et al. (1980) |  |
| being healthy | MN | Teutsch et al. (1979) | Mainland |
| being healthy | MC | Natoli (1994) | Mainland |
| Material and immaterial goods for good life | Sufficient nutritious food- Animal farming | MN | Scientific American | Mainland |
| *Mus musculus* | Health | being healthy | MN | Collares-Pereira et al. (1997) | Island |
| Material and immaterial goods for good life | Sufficient nutritious food- Animal farming | MO | Smith (1984) | Mainland |
| Sufficient nutritious food- Animal farming | MO | Witmer, Martins and Flor (2004) | Island |
| Sufficient nutritious food- Animal farming | MN | Collares-Pereira et al. (1997) | Island |
| Sufficient nutritious food- Animal farming | MN | Corrigan and Williams (1986) | Mainland |
| Sufficient nutritious food- Animal farming | MN | Smith (1984) | Mainland |
| Safety | Safety assets affected- human infrastructure | MO | Corrigan and Williams (1986) | Mainland |
| Safety assets affected- human infrastructure | MN | Smith (1984) | Mainland |
| Social, spiritual and cultural relations | Schooling impacted | MN | Sidorov and Putin (2010) | Mainland |
| *Oryctolagus cuniculus* | Material and immaterial goods for good life | Adequate livelihoods; Sufficient nutritious food- livestock and agricultural farming | MO | Pimentel et al. (2001) |  |
| Sufficient nutritious food- human food sources impacted | MN | De Vos and Petrides (1966) |  |
| Adequate livelihoods- feeling free | MN | Marks and Moore (1998) | Mainland |
| Sufficient nutritious food- Animal farming | MN | Scanlan, Berman. and Grant (2006) | Mainland |
| *Rattus norvegicus* | Health | being healthy | MO | Abdel-Moein and Hamza (2016) | Mainland |
| being healthy | MN | Aviat et al. (2009) | Mainland |
| being healthy | MN | Calhoun (1948) | Mainland |
| being healthy | MN | Collares-Pereira et al. (1997) | Island |
| being healthy | MN | Gottschalk (1966) | Mainland |
| being healthy | MN | Pimentel et al. (2001) |  |
| being healthy | DD | Novillo and Ojeda (2007) | Mainland |
| Material and immaterial goods for good life | Adequate livelihoods; Sufficient nutritious food- Agricultural farming | MO | Smith (1984) | Mainland |
| Sufficient nutritious food- Animal farming | MO | Witmer, Martins and Flor (2004) | Island |
| Sufficient nutritious food- Animal farming | MN | Collares-Pereira et al. (1997) | Island |
| Sufficient nutritious food- Agriculture | MN | De Vos and Petrides (1966) |  |
| Sufficient nutritious food- Agriculture | MN | Gottschalk (1966) | Mainland |
| Sufficient nutritious food- poultry farming | DD | Smith (1984) | Mainland |
| Safety | Safety assets affected- human infrastructure | MN | Smith (1984) | Mainland |
| *Rattus rattus* | Health | being healthy | MO | Flanigan et al. (1991) | Island |
| being healthy | MN | Collares-Pereira et al. (1997) | Island |
| being healthy | MN | Pimentel et al. (2001) | Mainland |
| being healthy | MC | Witmer, Campbell and Boyd (1998) | Island |
| *Rattus rattus* | Health  Health | being healthy | DD | Novillo and Ojeda (2007) | Mainland |
| being healthy | MN | Pimentel et al. (2001) |  |
| Material and immaterial goods for good life | Sufficient nutritious food- Animal farming | MO | Smith (1984) | Mainland |
| Sufficient nutritious food- Agricultural farming | MN | Ahmad, Hussian and Brooks (1995) | Mainland |
| Sufficient nutritious food- Animal farming | MN | Collares-Pereira et al. (1997) | Island |
| Sufficient nutritious food- animal farming | MN | Pimentel et al. (2001) |  |
| Sufficient nutritious food- Animal farming | MN | Pimentel et al. (2001) | Mainland |
| Sufficient nutritious food- Animal farming | MN | Smith (1984) | Mainland |
| Safety | Safety assets affected- human infrastructure | MN | Pimentel et al. (2000) | Mainland |
| Safety assets affected- human infrastructure | MN | Smith (1984) | Mainland |
| *Sus scrofa* | Health | being healthy | MO | Pozio (1998) | Mainland |
| being healthy | MN | Ojeda, Novillo and Cuevas (2010) |  |
| being healthy | MN | Pimentel, Zuniga and Morrison (2005) | Mainland |
| being healthy | DD | Novillo and Ojeda (2007) | Mainland |
| Material and immaterial goods for good life | Sufficient nutritious food- Animal farming | MO | Herrero and Fernandex De Luco (2003) | Mainland |
| Sufficient nutritious food- Agricultural farming | MO | Tolleson et al. (1995) | Mainland |
| Sufficient nutritious food- Animal farming | MN | Bankovich et al. (2016) | Mainland |
| *Sus scrofa* | Material and immaterial goods for good life | Sufficient nutritious food- Animal farming | MN | Cooper et al. (2010) | Mainland |
| Sufficient nutritious food- Animal farming | MN | Jaksic (1998) | Mainland |
| Sufficient nutritious food- Agricultural farming | MN | Jaksic et al. (2002) | Mainland |
| Sufficient nutritious food- Animal farming | MN | Linkie et al. (2007) | Mainland |
| Sufficient nutritious food-animal farming | MN | Ojeda, Novillo and Cuevas (2010) |  |
| Sufficient nutritious food- animal farming | MN | Pimentel, Zuniga and Morrison (2005) | Mainland |
| Sufficient nutritious food- Agricultural farming | MN | Spear and Chown (2009b) | Mainland |
| Sufficient nutritious food- Animal farming | MN | Tolleson et al. (1995) | Mainland |
| Sufficient nutritious food- Animal farming | MN | Tolleson et al. (1995) | Mainland |
| Sufficient nutritious food- Animal farming | MN | Woodall (1983) | Mainland |
| Sufficient nutritious food- Agricultural farming | MC | Barrett (1978) | Mainland |
| Sufficient nutritious food- Agricultural farming | MC | Taylor and Hellgren (1997) | Mainland |
| Safety | Safety assets affected- human infrastructure | MO | Katahira, Finnegan and Stone (1993) | Island |
| Safety assets affected- human infrastructure | MN | Tolleson et al. (1995) | Mainland |
| Safety assets affected- human infrastructure | MN | Woodall (1983) | Mainland |
